# Supplementary material for: Proton pump inhibitors and risk of gastrointestinal cancer: A meta‑analysis of cohort studies
Source: PubMed Central journal article supplement — Oncol Lett. 2023 Nov 20;27(1):28. doi: 10.3892/ol.2023.14161 (PMC10698841; doi:10.3892/ol.2023.14161), 2023-11-20
Supplement: Supplementary_Data.pdf [file Supplementary_Data.pdf]

### Data S1. Final search strategy for PubMed example.

('proton pump inhibitors'[Pharmacological Action] OR 'proton pump inhibitors'[MeSH Terms] OR ('proton'[All Fields] AND 'pump'[All Fields] AND 'inhibitors'[All Fields]) OR 'proton pump inhibitors'[All Fields] OR ('dexlansoprazole'[MeSH Terms] OR 'dexlansoprazole'[All Fields]) OR ('esomeprazole'[MeSH Terms] OR 'esomeprazole'[All Fields] OR 'esomeprazol'[All Fields]) OR ('lansoprazole'[MeSH Terms] OR 'lansoprazole'[All Fields] OR 'lansoprazol'[All Fields]) OR ('omeprazole'[MeSH Terms] OR 'omeprazole'[All Fields] OR 'esomeprazole'[MeSH Terms] OR 'esomeprazole'[All Fields] OR 'omeprazol'[All Fields]) OR ('pantoprazole'[MeSH Terms] OR 'pantoprazole'[All Fields] OR 'pantoprazol'[All Fields]) OR ('rabeprazol'[All Fields] OR 'rabeprazole'[MeSH Terms] OR 'rabeprazole'[All Fields])) AND ('cancer s'[All Fields] OR 'cancerated'[All Fields] OR 'canceration'[All Fields] OR 'cancerization'[All Fields] OR 'cancerized'[All Fields] OR 'cancerous'[All Fields] OR 'neoplasms'[MeSH Terms] OR 'neoplasms'[All Fields] OR 'cancer'[All Fields] OR 'cancers'[All Fields]) AND ('cohort studies'[MeSH Terms] OR ('cohort'[All Fields] AND 'studies'[All Fields]) OR 'cohort studies'[All Fields] OR ('cohort'[All Fields] AND 'study'[All Fields]) OR 'cohort study'[All Fields])

### Translations

Proton pump inhibitors: 'proton pump inhibitors'[Pharmacological Action] OR 'proton pump inhibitors'[MeSH Terms] OR ('proton'[All Fields] AND 'pump'[All Fields] AND 'inhibitors'[All Fields]) OR 'proton pump inhibitors'[All Fields]

Dexlansoprazole: 'dexlansoprazole'[MeSH Terms] OR 'dexlansoprazole'[All Fields]

Esomeprazole: 'esomeprazole'[MeSH Terms] OR 'esomeprazole'[All Fields] OR 'esomeprazol'[All Fields] OR 'esomeprazole's'[All Fields]

Lansoprazole: 'lansoprazole'[MeSH Terms] OR 'lansoprazole'[All Fields] OR 'lansoprazol'[All Fields]

Omeprazole: 'omeprazole'[MeSH Terms] OR 'omeprazole'[All Fields] OR 'esomeprazole'[MeSH Terms] OR 'esomeprazole'[All Fields] OR 'omeprazol'[All Fields]

Pantoprazole: 'pantoprazole'[MeSH Terms] OR 'pantoprazole'[All Fields] OR 'pantoprazol'[All Fields]

Rabeprazole: 'rabeprazol'[All Fields] OR 'rabeprazole'[MeSH Terms] OR 'rabeprazole'[All Fields] OR 'rabeprazole's'[All Fields]

Cancer: 'cancer's'[All Fields] OR 'cancerated'[All Fields] OR 'canceration'[All Fields] OR 'cancerization'[All Fields] OR 'cancerized'[All Fields] OR 'cancerous'[All Fields] OR 'neoplasms'[MeSH Terms] OR 'neoplasms'[All Fields] OR 'cancer'[All Fields] OR 'cancers'[All Fields]

Cohort study: 'cohort studies'[MeSH Terms] OR ('cohort'[All Fields] AND 'studies'[All Fields]) OR 'cohort studies'[All Fields] OR ('cohort'[All Fields] AND 'study'[All Fields]) OR 'cohort study'[All Fields]
